# Supplementary material
Source: Springer Nature journal article supplement (https://www.springermedizin.de/resource/supplementary/13014_2013_964_MOESM1_ESM.pdf/9634478)

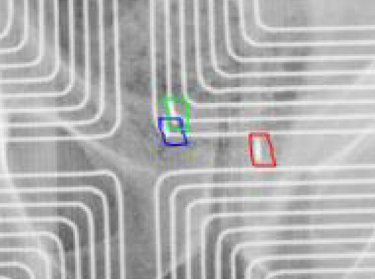

**Fraction 1**

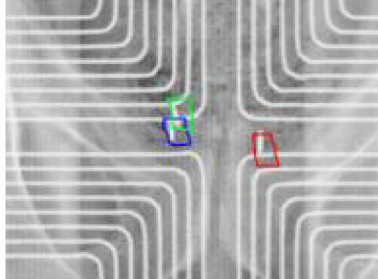

**Fraction 2**

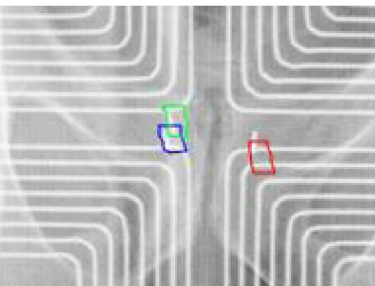

**Fraction 3**

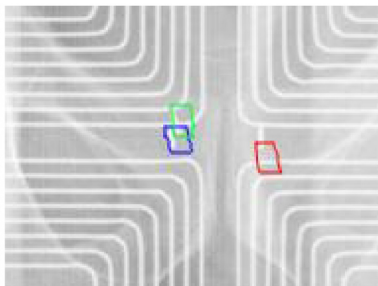

**Fraction 4**

Supplement: MOESM1 [file 9634478]
